# Supplementary material for: Role of Metformin in Morbidity and Mortality Associated with Urinary Tract Infections in Patients with Type 2 Diabetes
Source: MDPI journal article supplement (doi:10.3390/jpm12050702), 2022-04-28
Supplement: s1 [file s1]

**Supplementary Table S1.** Diseases and related ICD-9-CM, ICD-10-CM codes.

| Disease                                                        | ICD-9-CM Codes                                                                                                                                                               | ICD-10-CM Codes                                                                                                                                                                                                                  |
|----------------------------------------------------------------|------------------------------------------------------------------------------------------------------------------------------------------------------------------------------|----------------------------------------------------------------------------------------------------------------------------------------------------------------------------------------------------------------------------------|
| Type 2 diabetes mellitus                                       | 250.xx, except 250.1x                                                                                                                                                        | E11                                                                                                                                                                                                                              |
| Type 1 diabetes mellitus                                       | 250.1x                                                                                                                                                                       | E10                                                                                                                                                                                                                              |
| Hepatic failure                                                | 570, 572.2, 572.4, 572.8                                                                                                                                                     | K72.00, K72.01, K72.10, K72.11,<br>K72.90, K76.2, K72.90, K72.91,<br>K76.7, K76.81                                                                                                                                               |
| Surgery involving the<br>urinary system                        | 55-59                                                                                                                                                                        | OT                                                                                                                                                                                                                               |
| Malignant neoplasm of the<br>urinary tract                     | 179-189                                                                                                                                                                      | C64-C68                                                                                                                                                                                                                          |
| Malignant neoplasm of<br>lymphatic and hematopoietic<br>tissue | 200-208                                                                                                                                                                      | C81-C96                                                                                                                                                                                                                          |
| Dialysis                                                       | V56.0, V56.8, V45.1                                                                                                                                                          | Z49.31, Z49.32, Z99.2                                                                                                                                                                                                            |
| Overweight                                                     | 278.02, 783.1, V85.2                                                                                                                                                         | R63.5                                                                                                                                                                                                                            |
| Obesity                                                        | 278.00, 649.1, V77.8, V85.3                                                                                                                                                  | E66.09, E66.1, E66.8, E66.9,<br>Z13.89                                                                                                                                                                                           |
| Severe obesity                                                 | 278.01, 649.2, V45.86, V85.4                                                                                                                                                 | E66.01, E66.2                                                                                                                                                                                                                    |
| Smoking status                                                 | 305.1, 649.0, V15.82                                                                                                                                                         | F17.200, F17.201, F17.210,<br>F17.220, F17.221, F17.290,<br>F17.291, Z87.891                                                                                                                                                     |
| Alcohol disorders                                              | 291, 303, 305.0, 571.0-571.3, V11.3,<br>V79.1                                                                                                                                | F10, K70.40, K70.41, K70.9                                                                                                                                                                                                       |
| Hypertension                                                   | 401-405, A26                                                                                                                                                                 | I10, I11, I12, I13, I15, N26                                                                                                                                                                                                     |
| Dyslipidemia                                                   | 272                                                                                                                                                                          | E71.30, E71.31, E71.32, E71.39,<br>E75.21, E75.22, E75.23, E75.24,<br>E75.25, E75.29, E75.3, E75.4,<br>E75.5, E75.6, E77, E78.0, E78.1,<br>E78.2, E78.3, E78.4, E78.5,<br>E78.6, E78.70, E78.71, E78.72,<br>E78.79, E78.8, E78.9 |
| Coronary artery disease                                        | 410-414                                                                                                                                                                      | I20, I21, I22, I24, I25.1, I25.2,<br>I25.3, I25.4, I25.5, I25.6, I25.7,<br>I25.81, I25.82, I25.83, I25.84,<br>I25.89, I25.9                                                                                                      |
| Chronic kidney disease                                         | 250.4x, 403.xx, 404.xx, 585.xx,<br>586.xx, 581.8x, 791.0x, 593.9x,<br>V42.0x, V45.1x, V56.0x, V56.8x,<br>39.27, 39.42, 39.43, 39.49, 39.50,<br>39.53, 39.93, 39.94, or 39.95 | E10.2, E10.65, E11.2, E11.65,<br>E13.2, I12, I13, N03, N08,<br>E10.21, E11.21, N05, N06, N07,<br>N14, N15.0, N15.8, N15.9, N16,<br>N17.1, N17.2, N18, N19, Z94.0,<br>Z49.31, Z49.32, Z99.2, Z94.0                                |
| Stroke                                                         | 430-438                                                                                                                                                                      | G45.0, G45.1, G45.2, G45.3,<br>G45.4, G45.8, G45.9, G46, I60,<br>I61, I62, I63, I65, I66, I67.0,<br>I67.1, I67.2, I67.3, I67.4, I67.5,<br>I67.6, I67.7, I67.8, I67.9, I68, I69                                                   |
| Atrial fibrillation                                            | 427                                                                                                                                                                          | I45.0, I45.1, I45.2, I45.3, I45.4,<br>I45.5, I45.6                                                                                                                                                                               |

|                                          |                                                                                                  |                                                                                                                          |
|------------------------------------------|--------------------------------------------------------------------------------------------------|--------------------------------------------------------------------------------------------------------------------------|
| Heart failure                            | 398.91, 402.01, 402.11, 402.91,<br>404.01, 404.03, 404.11, 404.13,<br>404.91, 404.93, 428, 429.4 | I09.81, I11.0, I13.0, I13.2, I50,<br>I97.0, I97.110, I97.111, I97.120,<br>I97.121, I97.130, I97.131,<br>I97.190, I97.191 |
| Peripheral arterial occlusion<br>disease | 440.0, 440.20, 440.21, 440.22,<br>440.23, 440.24, 440.3, 440.4, 443.9,<br>443.81, 443.89         | I70.2, I70.92, I75.0, I73.9                                                                                              |
| Retinopathy                              | 362.02, 362.07, 362.0                                                                            | H35.0, E08.311-E08.359,<br>E09.311-E09.359, E11.311-<br>E11.359, E13.311-E13.359                                         |
| Chronic obstructive<br>pulmonary disease | 491, 492, or 496                                                                                 | J41, J42, J44, J43, or J44.9                                                                                             |
| Rheumatoid arthritis                     | 714.0                                                                                            | M06.9                                                                                                                    |
| Systemic lupus<br>erythematosus          | 710.0                                                                                            | M32.10                                                                                                                   |
| Hepatitis B and C infection              | 277.4, 570, 572.8, 573.3, 573.8,<br>576.8, 782.4                                                 | B15.0-B19.9                                                                                                              |
| Liver cirrhosis                          | 571.5, 571.2, 571.6                                                                              | K70.2, K70.30, K70.31, K74.0,<br>K74.1, K74.2, K74.60, K74.69,<br>K74.3, K74.4, K74.5                                    |
| Urolithiasis                             | 592, 594                                                                                         | N20-N23                                                                                                                  |
| Cancers                                  | 140-178, 190-199, 209                                                                            | C00-C63, C69-C80, C7A-C7B                                                                                                |
| Psychosis                                | 290-299, except 290,290.4, 291.2,<br>292.82                                                      | F20-29                                                                                                                   |
| Depression                               | 311                                                                                              | F32, F33                                                                                                                 |
| Dementia                                 | 290,290.4, 291.2, 292.82 and 331                                                                 | F03.90, F05, F02.80, F02.81,<br>F01.50, F01.51, G30                                                                      |
| Urethritis                               | 597                                                                                              | N34                                                                                                                      |
| Cystitis                                 | 595                                                                                              | N30                                                                                                                      |
| Acute pyelonephritis                     | 590                                                                                              | A10                                                                                                                      |
| Sepsis                                   | 790.7, 038, 041, 995.91, 995.92                                                                  | R78.81, A41, R65.20, R65.21                                                                                              |
